# Supplementary material for: Efficient solar-driven conversion of nitrogen to ammonia in pure waterviahydrogenated bismuth oxybromide
Source: Royal Society of Chemistry journal article supplement (doi:10.1039/c8ra02483a), 2018-01-01
Supplement: c8ra02483a1.pdf [file c8ra02483a1.pdf]

## Supporting Information

### **Efficient Solar-Driven Conversion of Nitrogen to Ammonia in Pure Water via Hydrogenated Bismuth Oxybromide**

Yuanqing Bi, Yu Wang, Xiaoli Dong\*, Nan Zheng, Hongchao Ma, Xiufang Zhang

School of Light Industry and Chemical Engineering, Dalian Polytechnic University, #1 Qinggongyuan, Dalian 116034, P R  
China. E-mail: dongxiaoli65@163.com

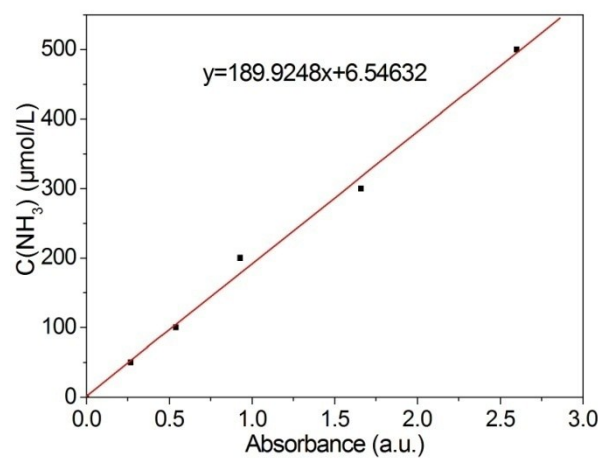

**Fig. S1** The standard curve of NH<sub>3</sub> with Nessler's reagent.

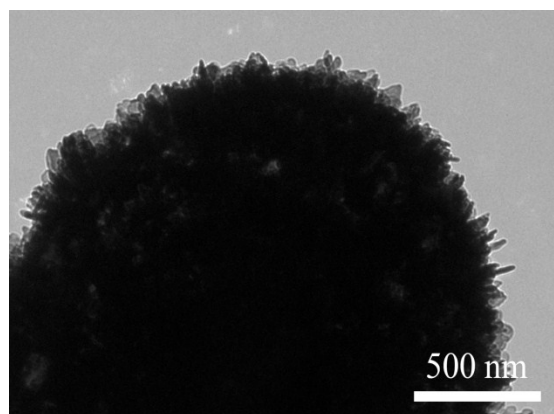

**Fig. S2** TEM image of H-BiOBr.

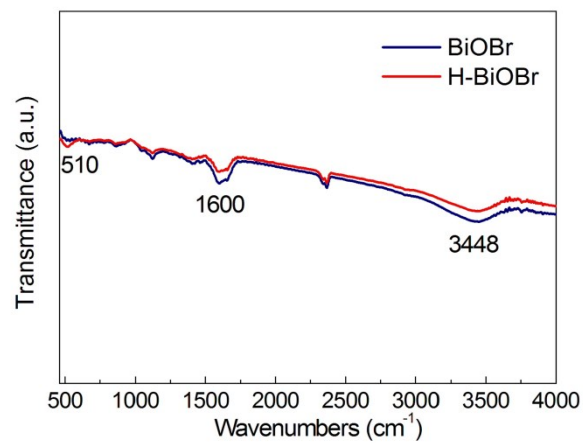

Fig. S3 FT-IR spectra of the as-prepared BiOBr and H-BiOBr.

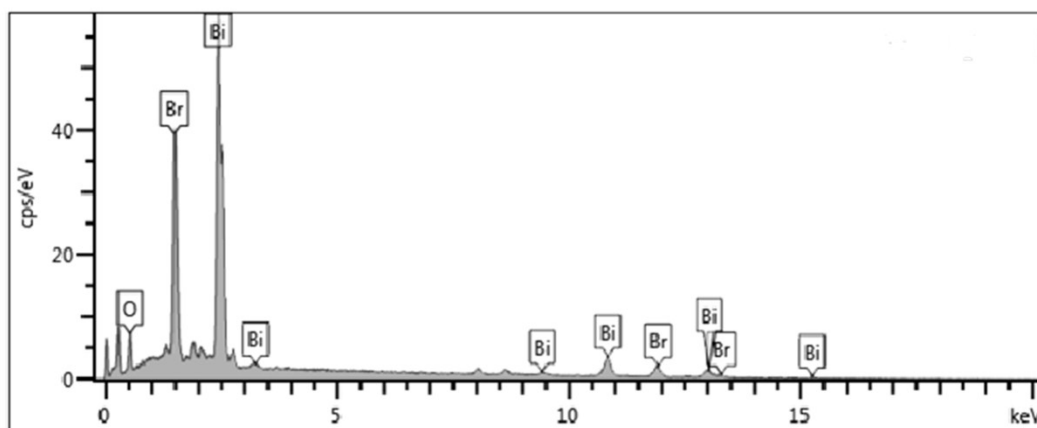

Fig. S4 EDS spectra of H-BiOBr.

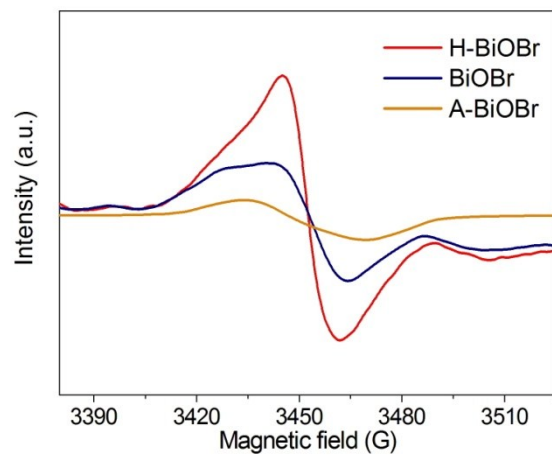

**Fig. S5** The ESR spectra for different samples.

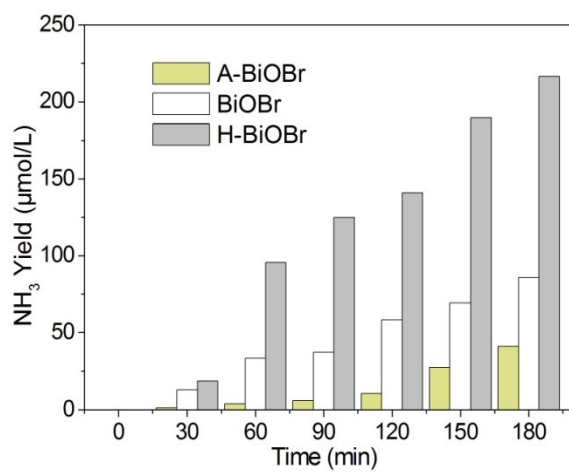

**Fig. S6** Photocatalytic nitrogen fixation performance with different OV concentrations.

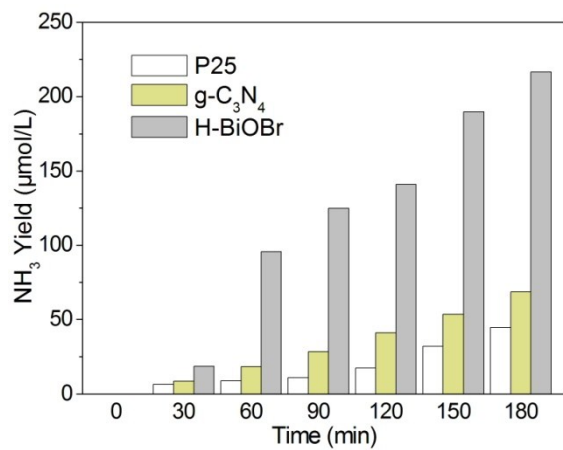

**Fig. S7** The comparison of photocatalytic nitrogen fixation properties of different photocatalysts.

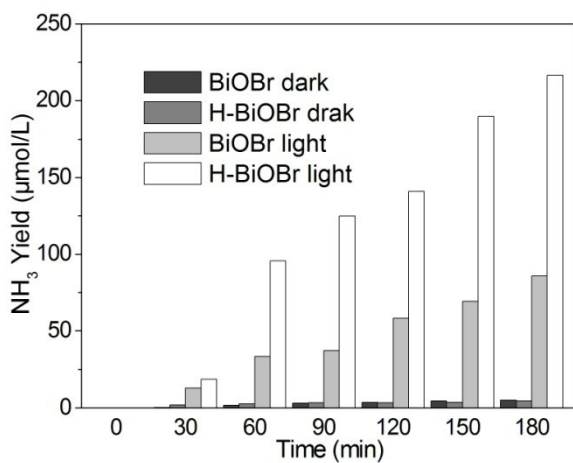

**Fig. S8** The dark nitrogen fixation experiment of two samples.

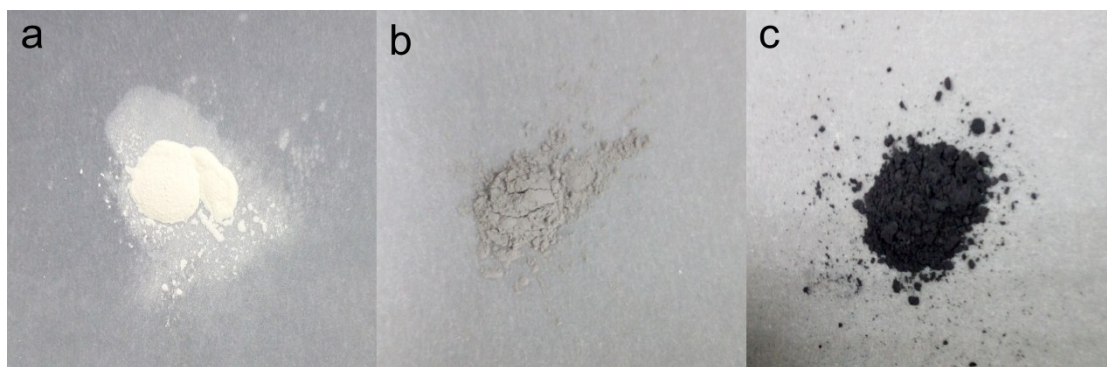

**Fig. S9** The sample of BiOBr calcined with hydrogen at different temperature, 100°C (a), 200°C (b), 300°C (c).

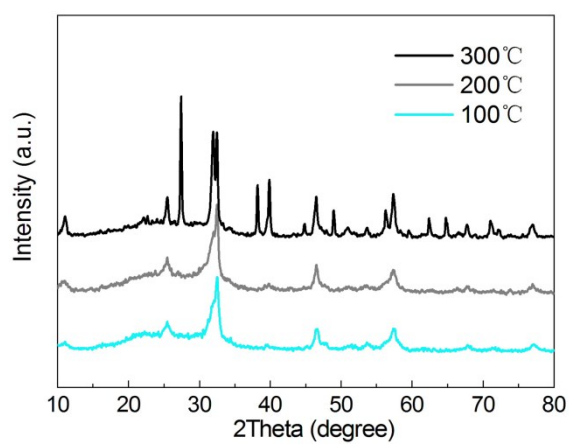

**Fig. S10** XRD patterns of BiOBr calcined with hydrogen at different temperature.

**Table. S1** The corresponding element information of EDS measurement.

| Element | Line Type | Apparent Concentration | k Ratio | Wt%    | Wt% Sigma | Atomic % | Standard Label | Factory Standard | Standard Calibration Date |
|---------|-----------|------------------------|---------|--------|-----------|----------|----------------|------------------|---------------------------|
| O       | K series  | 3.64                   | 0.01226 | 7.19   | 0.28      | 41.92    | SiO2           | Yes              |                           |
| Br      | L series  | 15.66                  | 0.14027 | 23.11  | 0.28      | 26.98    | KBr            | Yes              |                           |
| Bi      | M series  | 52.43                  | 0.52430 | 69.70  | 0.36      | 31.11    | Bi             | Yes              |                           |
| Total:  |           |                        |         | 100.00 |           | 100.00   |                |                  |                           |

**Table. S2** The BET surface area and Average pore Diameter of two samples

|         | BET surface area ( $\text{m}^2 \text{g}^{-1}$ ) | Average pore Diameter (nm) |
|---------|-------------------------------------------------|----------------------------|
| BiOBr   | 31.6                                            | 10.248                     |
| H-BiOBr | 26.56                                           | 22.0904                    |

**Table. S3** The performance of photocatalytic nitrogen fixation for different photocatalysts under various reaction conditions.

| Catalyst                                            | Reaction medium           | Scavenger       | Light Source                                   | NH <sub>3</sub> generation rate (g <sup>-1</sup> ) | AQE                    | Refs      |
|-----------------------------------------------------|---------------------------|-----------------|------------------------------------------------|----------------------------------------------------|------------------------|-----------|
| H-BiOBr                                             | H <sub>2</sub> O<br>25 °C | No              | 300 W Xenon lamp<br>(Full Spectrum)            | 360.8 μmol/h                                       | 2.11%<br>(λ = 380 nm)  | This work |
| CuCr-LDH nanosheet                                  | H <sub>2</sub> O 25 °C    | No              | 300 W Xenon lamp<br>(λ>420 nm)                 | 280 μmol/h                                         | 0.22%<br>(λ = 380 nm)  | [1]       |
| g-C <sub>3</sub> N <sub>4</sub> of nitrogen vacancy | H <sub>2</sub> O          | 20%<br>Methanol | 300 W Xenon lamp<br>(λ>420 nm)                 | 160 μmol/h                                         | No                     | [2]       |
| (010) facets of BiOCl                               | H <sub>2</sub> O 25 °C    | 25%<br>Methanol | 500 W Xenon lamp<br>(Full Spectrum)            | 92.4 μmol/h                                        | 2.15 %<br>(λ = 254 nm) | [3]       |
| (001) faces of Bi <sub>5</sub> O <sub>7</sub> I     | H <sub>2</sub> O 25 °C    | 20%<br>Methanol | 300 W Xenon lamp<br>(280-800 nm)               | 11.15 μmol/h                                       | 2.55 %<br>(λ = 365 nm) | [4]       |
| Iron titanate                                       | H <sub>2</sub> O          | Ethanol         | High pressure Hg lamp<br>(λ> 320 nm)           | 11.3 μmol/h                                        | No                     | [5]       |
| TiO <sub>2</sub> oxygen vacancy                     | H <sub>2</sub> O 40 °C    | No              | 100 W high pressure Hg lamp<br>(Full Spectrum) | 2.08 μmol/h                                        | 0.35 %<br>(λ = 350 nm) | [6]       |

## Notes and references

- 1 Y. Zhao, Y. Zhao, G. I. N. Waterhouse, L. Zheng, X. Cao, F. Teng, L.-Z. Wu, C.-H. Tung, D. O'Hare and T. Zhang, *Adv. Mater.*, 2017, **29**, 1703828.
- 2 G. Dong, W. Ho and C. Wang, *J. Mater. Chem. A*, 2015, **3**, 23435-23441.
- 3 H. Li, J. Shang, J. Shi, K. Zhao, L. Zhang, *Nanoscale*, 2016, **8**, 1986-1993.
- 4 Y. Bai, L. Ye, T. Chen, L. Wang, X. Shi, X. Zhang and D. Chen, *ACS Appl. Mater. Inter.*, 2016, **8**, 27661-27668.
- 5 O. Rusina, A. Eremenko, G. Frank, H.P. Strunk, H. Kisch, *Angew. Chem. Int. Ed.*, 2001, **40**, 3993-3995.
- 6 H. Hirakawa, M. Hashimoto, Y. Shiraishi, T. Hirai, *J. Am. Chem. Soc.*, 2017, **139**, 10929-10936.
